# Supplementary material for: Anti-seizure medication in pregnancy and pregnancy, baby, and child outcomes: a population-based cohort study
Source: Research Square preprint supplement (doi:10.21203/rs.3.rs-6576771/v1), 2025-06-29

Supplementary figures

**Anti-seizure medication in pregnancy and pregnancy, baby, and child outcomes: a population-based cohort study**

*Emily Moore1, Morven Millar1, Rachel Merrick1, Tanja Mueller1,2, Victoria Stark1, Lynne Jarvis1, Amanj Kurdi1,2,3,4,5, Leanne Hopkins1, Stuart McTaggart1, Rute Vieira1,6, Marion Bennie1,2, Rachael Wood1,7**

**Corresponding author:** Professor Rachael Wood,[rachael.wood@phs.scot](mailto:rachael.wood@phs.scot)

**Keywords**: anti-seizure medication, pregnancy, congenital conditions, developmental concerns, cohort study, Scotland

1 Public Health Scotland, Glasgow/Edinburgh, UK

2 Strathclyde Institute of Pharmacy and Biomedical Sciences, University of Strathclyde, Glasgow, UK

3 College of Pharmacy, Hawler Medical University, Erbil, Kurdistan Region, Iraq

4 Al-Kitab University, Kirkuk, 36015, Iraq

5 School of Pharmacy, Sefako Makgatho Health Sciences University, Pertoria 0205, South Africa

6 Institute of Applied Health Sciences, University of Aberdeen, Aberdeen, UK

7 Usher Institute, University of Edinburgh, Edinburgh, UK

***Figure 1:*** *All singleton pregnancies conceived in Scotland between 1 April 2010 and 2 July 2023 (pregnancy cohort) that were exposed to an ASM during pregnancy: by gestational week that the pregnancy was first exposed to the ASM*


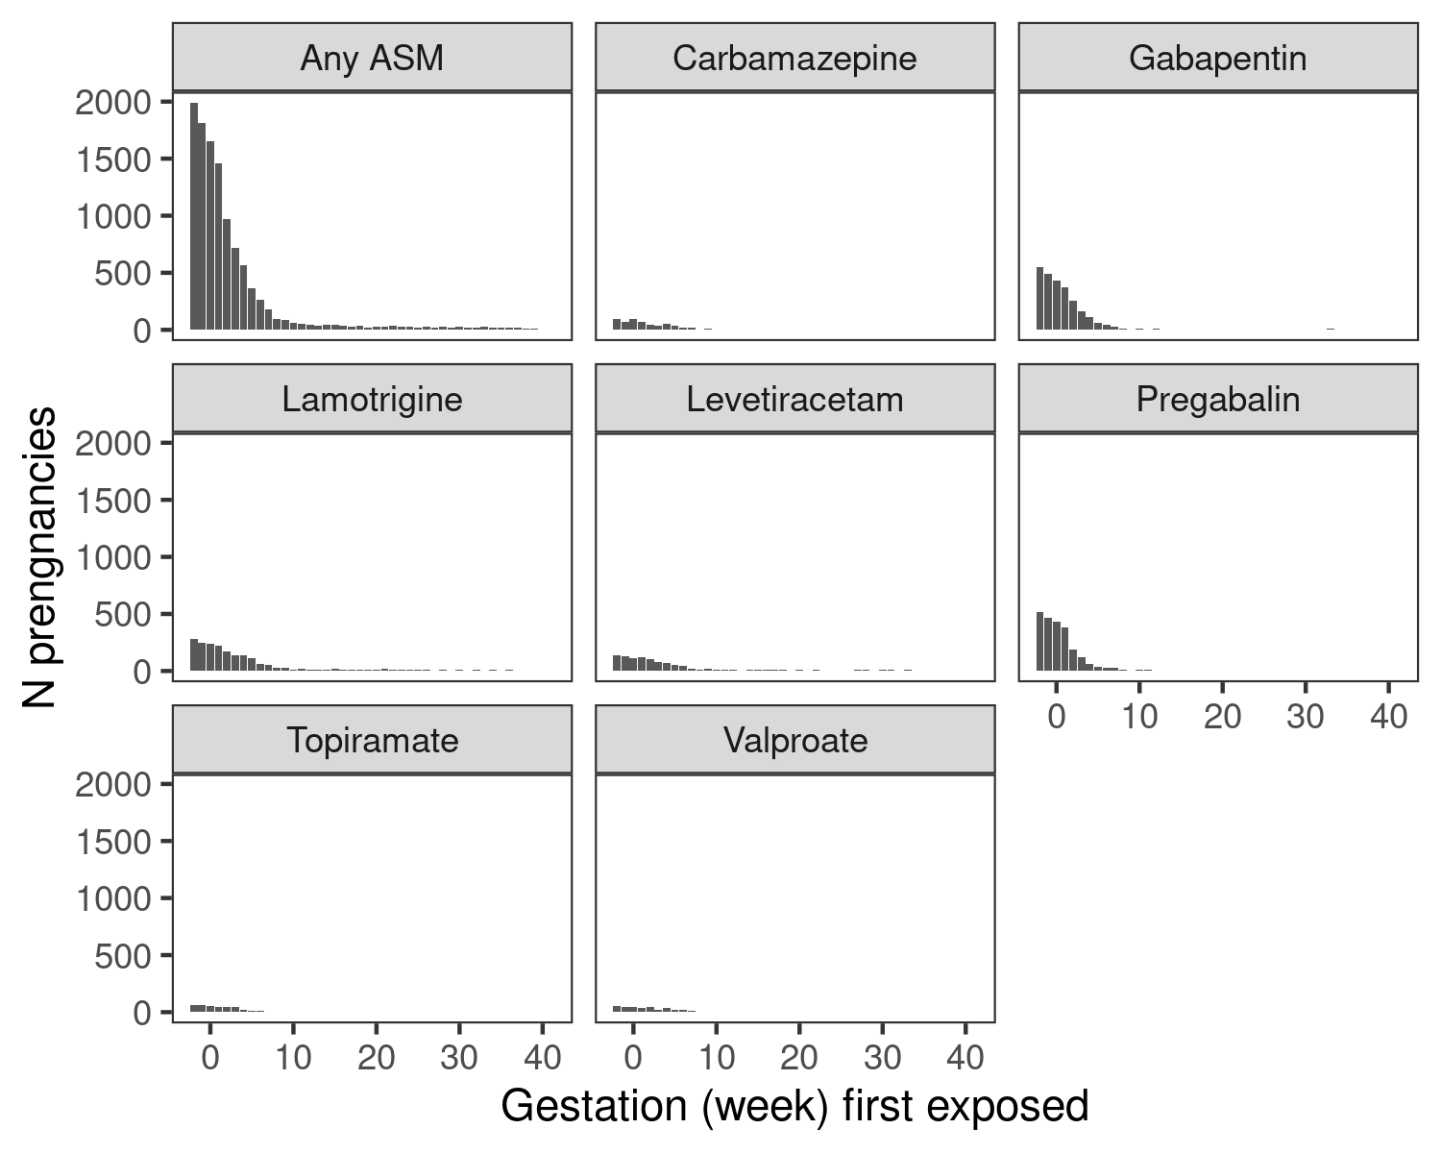


ASM exposure during pregnancy is counted from 28 days before conception
(-2 weeks gestation) up to the end of pregnancy.

***Figure 2:*** *Odds ratios for the association between exposure to anti-seizure medicine (ASM) during pregnancy and pregnancy loss; singleton pregnancies conceived in Scotland between 1 April 2010 and 2 July 2023 (pregnancy cohort):*

*Propensity score approach and primary analysis (adjusted) models.*


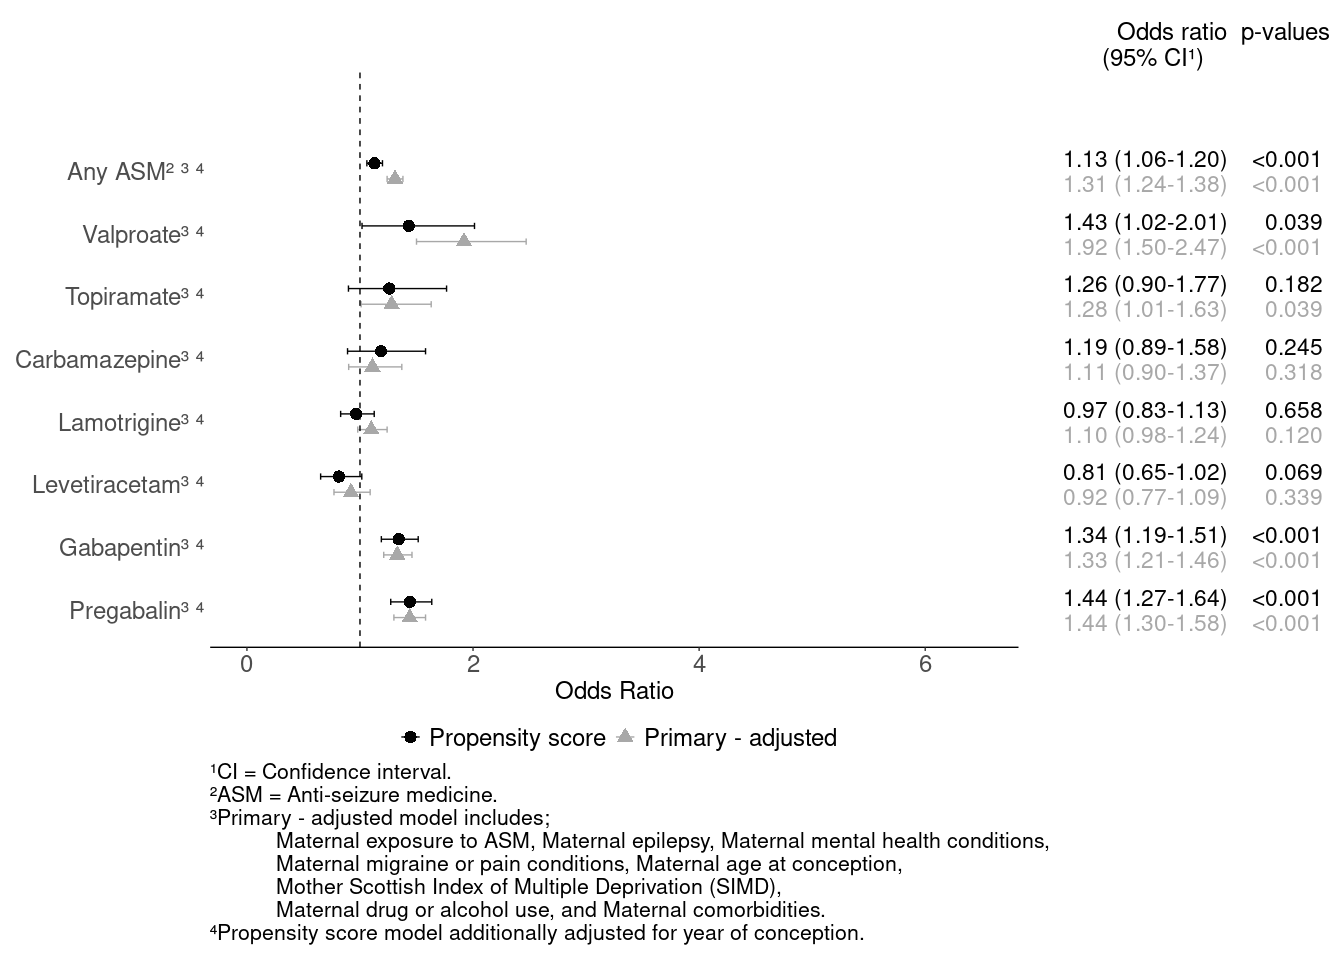


***Figure 3:*** *Odds ratios for the association between exposure to anti-seizure medicine (ASM) during pregnancy and pregnancy loss; singleton pregnancies conceived in Scotland between 1 April 2010 and 2 July 2023 (pregnancy cohort):*

*Restricted to pregnancies from women reported to have epilepsy.*


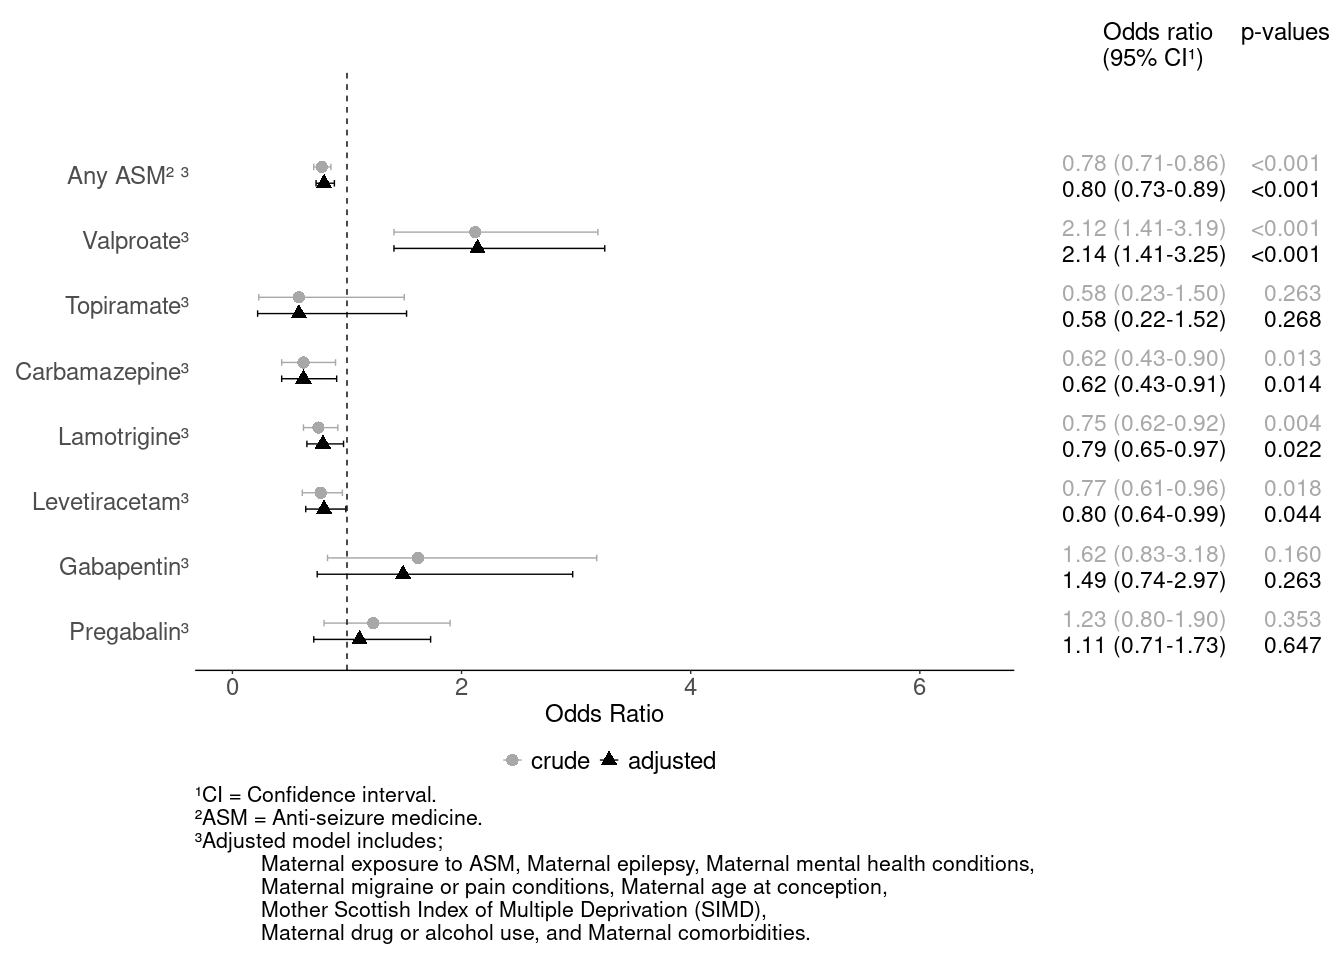


***Figure 4:*** *Odds ratios for the association between exposure to anti-seizure medicine (ASM) during pregnancy and pregnancy loss; singleton pregnancies conceived in Scotland between 1 April 2010 and 2 July 2023 (pregnancy cohort):*

*Stratified by maternal high dose folic acid status.*


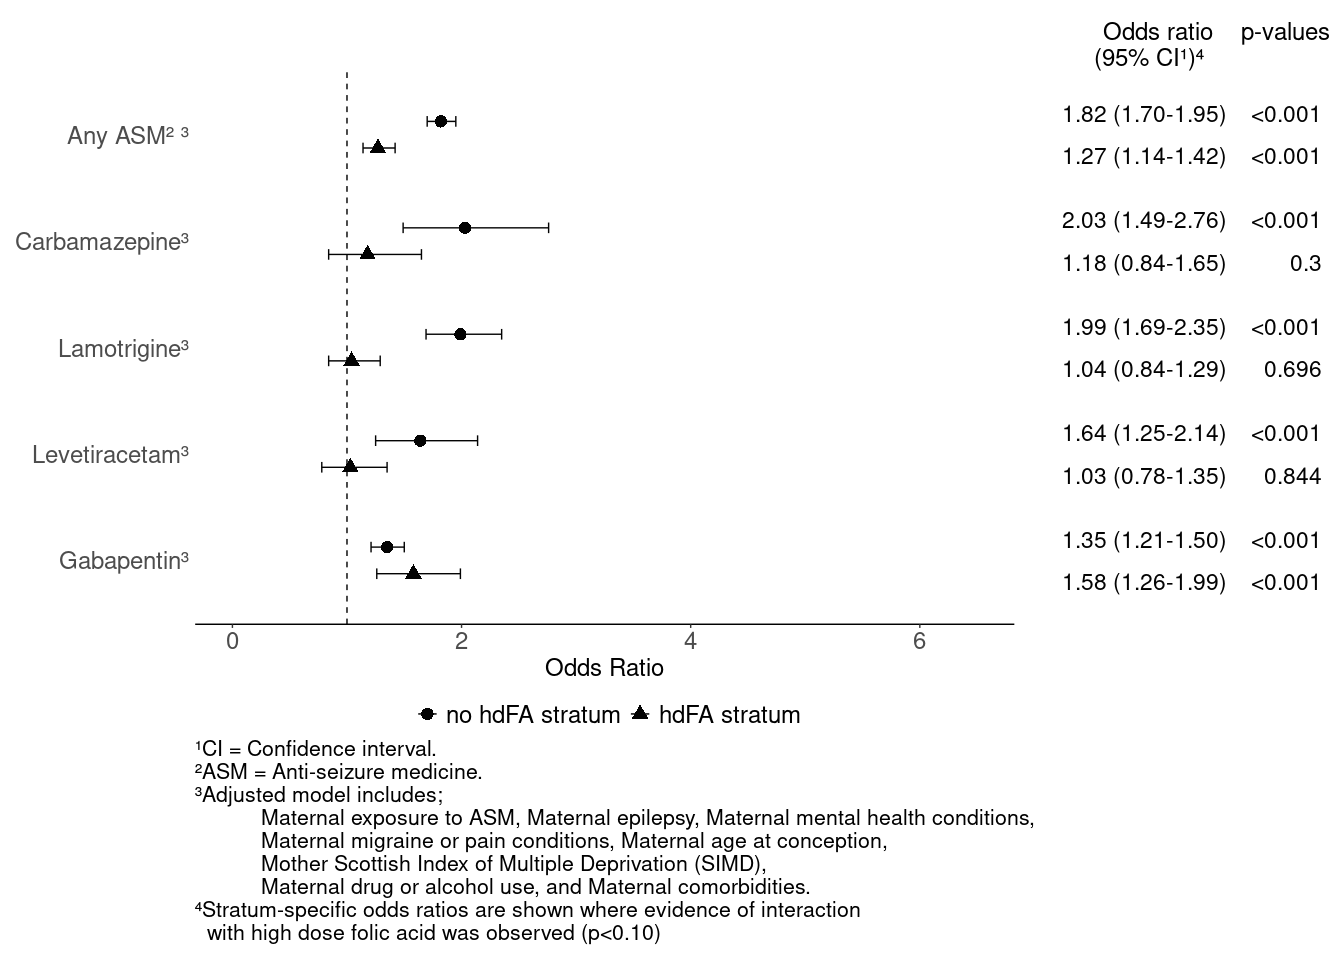


***Figure 5:*** *Odds ratios for the association between exposure to anti-seizure medicine (ASM) during pregnancy and congenital conditions; babies from singleton pregnancies conceived in Scotland between 1 April 2010 and 2 April 2021 (baby cohort):*

*Propensity score approach and primary analysis (adjusted) models.*


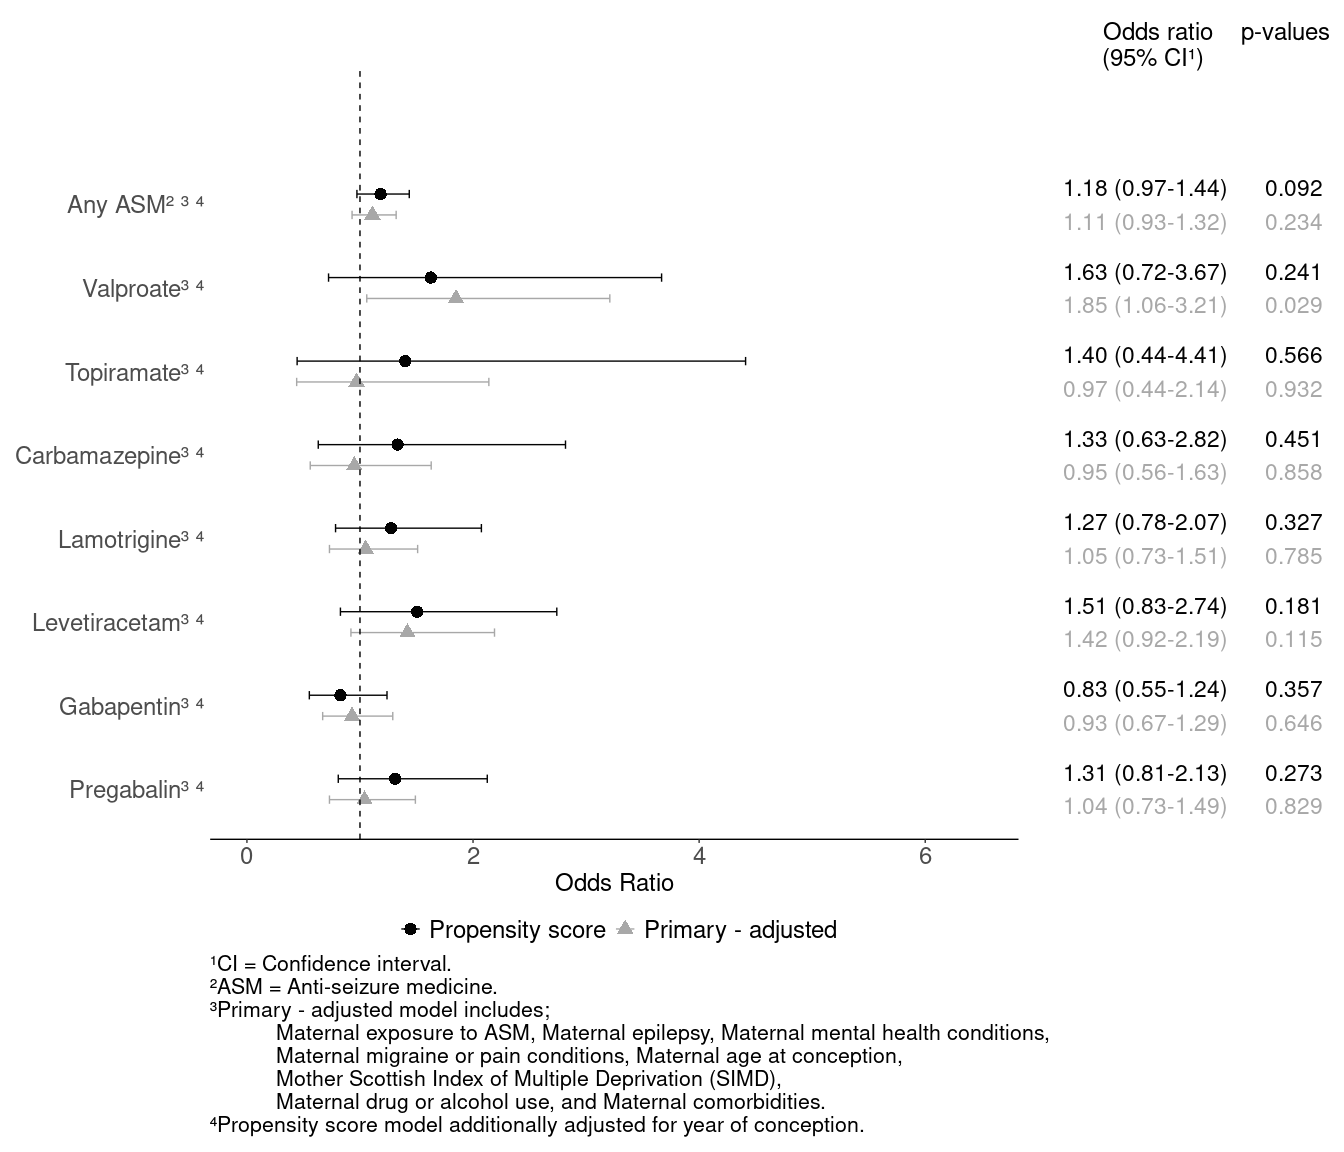


***Figure 6:*** *Odds ratios for the association between exposure to anti-seizure medicine (ASM) during pregnancy and congenital conditions; babies from singleton pregnancies conceived in Scotland between 1 April 2010 and 2 April 2021 (baby cohort):*

*Restricted to babies from women reported to have epilepsy.*


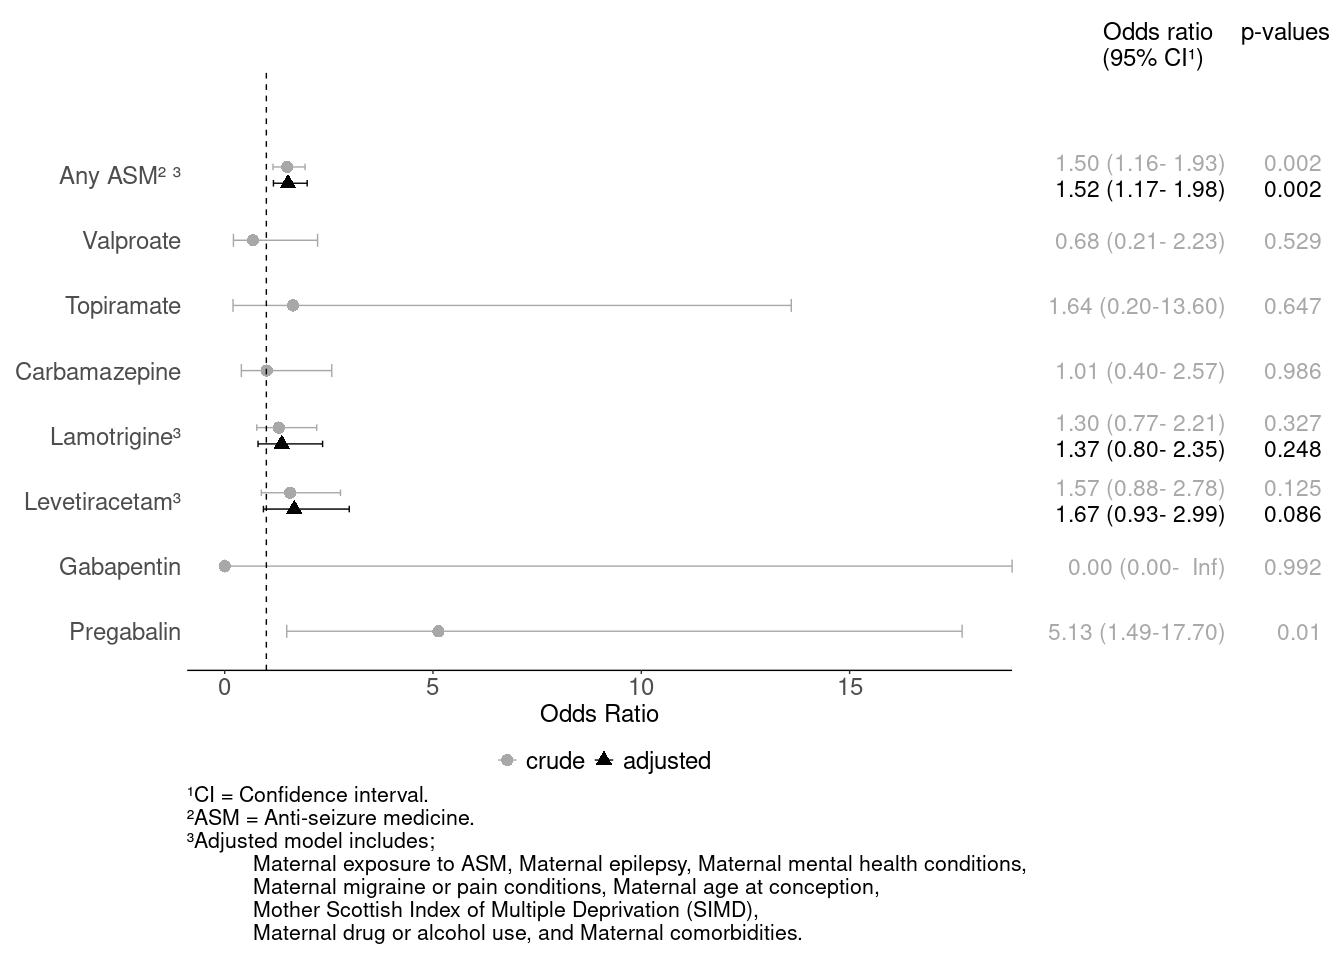


***Figure 7:*** *Odds ratios for the association between exposure to anti-seizure medicine (ASM) during pregnancy and congenital conditions; babies from singleton pregnancies conceived in Scotland between 1 April 2010 and 2 April 2021 (baby cohort):*

*Restricted to babies reaching at least 12+0 weeks gestation.*


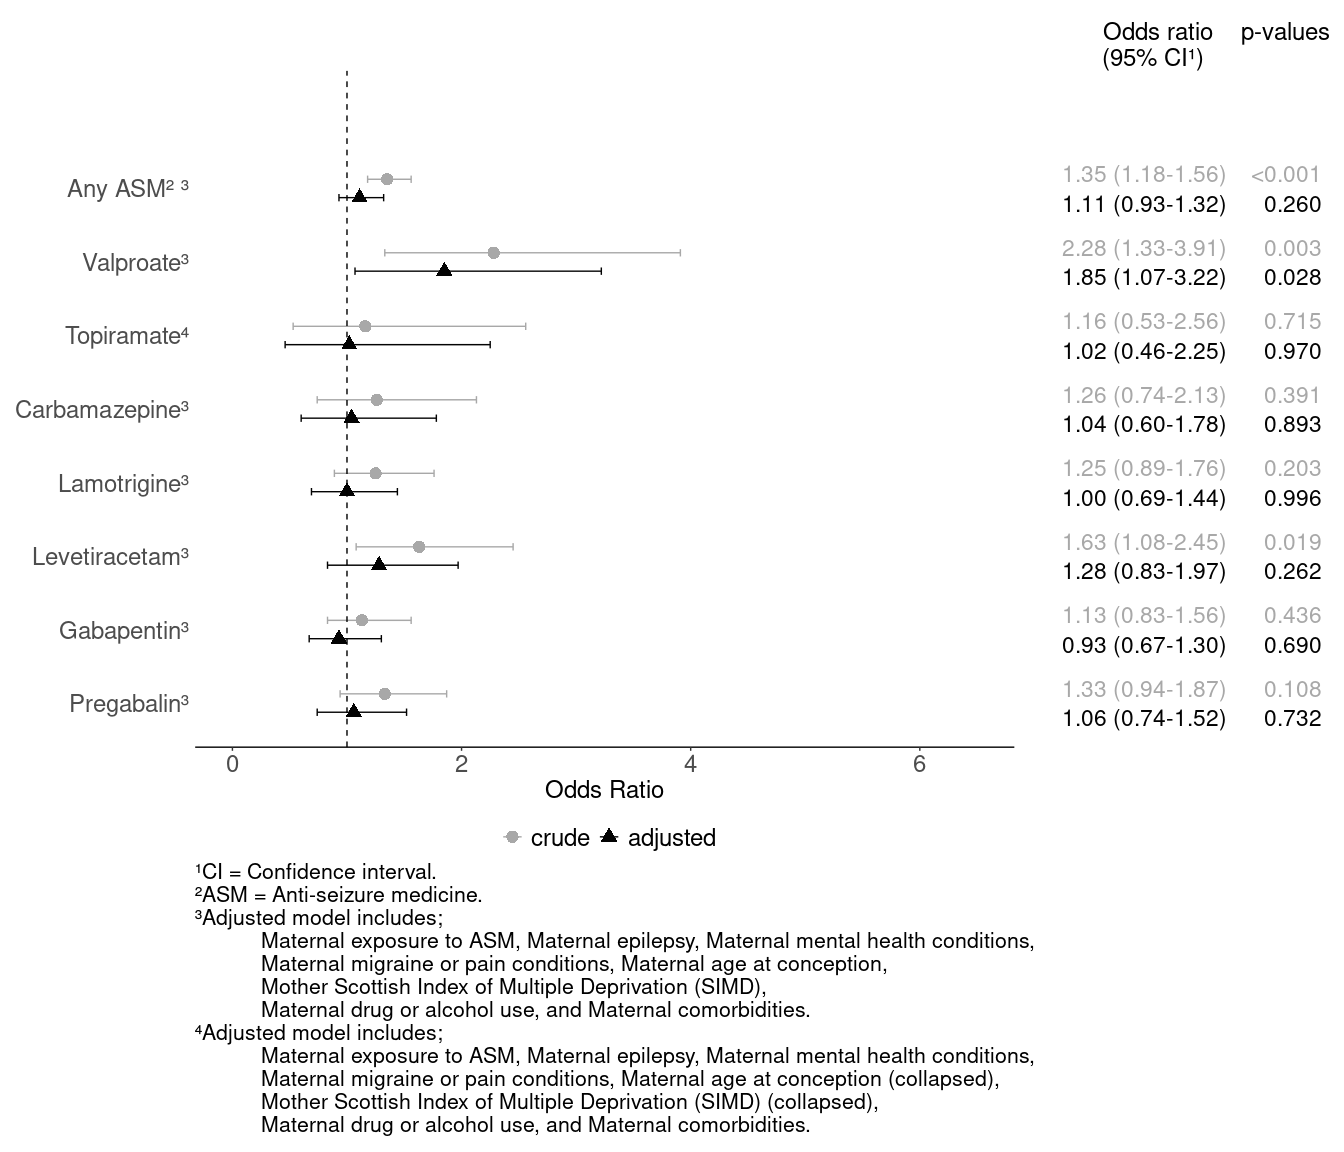


***Figure 8:*** *Odds ratios for the association between exposure to anti-seizure medicine (ASM) during pregnancy and early childhood developmental concerns (at 27-30 month assessment); live births from singleton pregnancies conceived in Scotland between 1 April 2010 and 1 July 2020 (live birth cohort):*

*Propensity score approach and primary analysis (adjusted) models.*


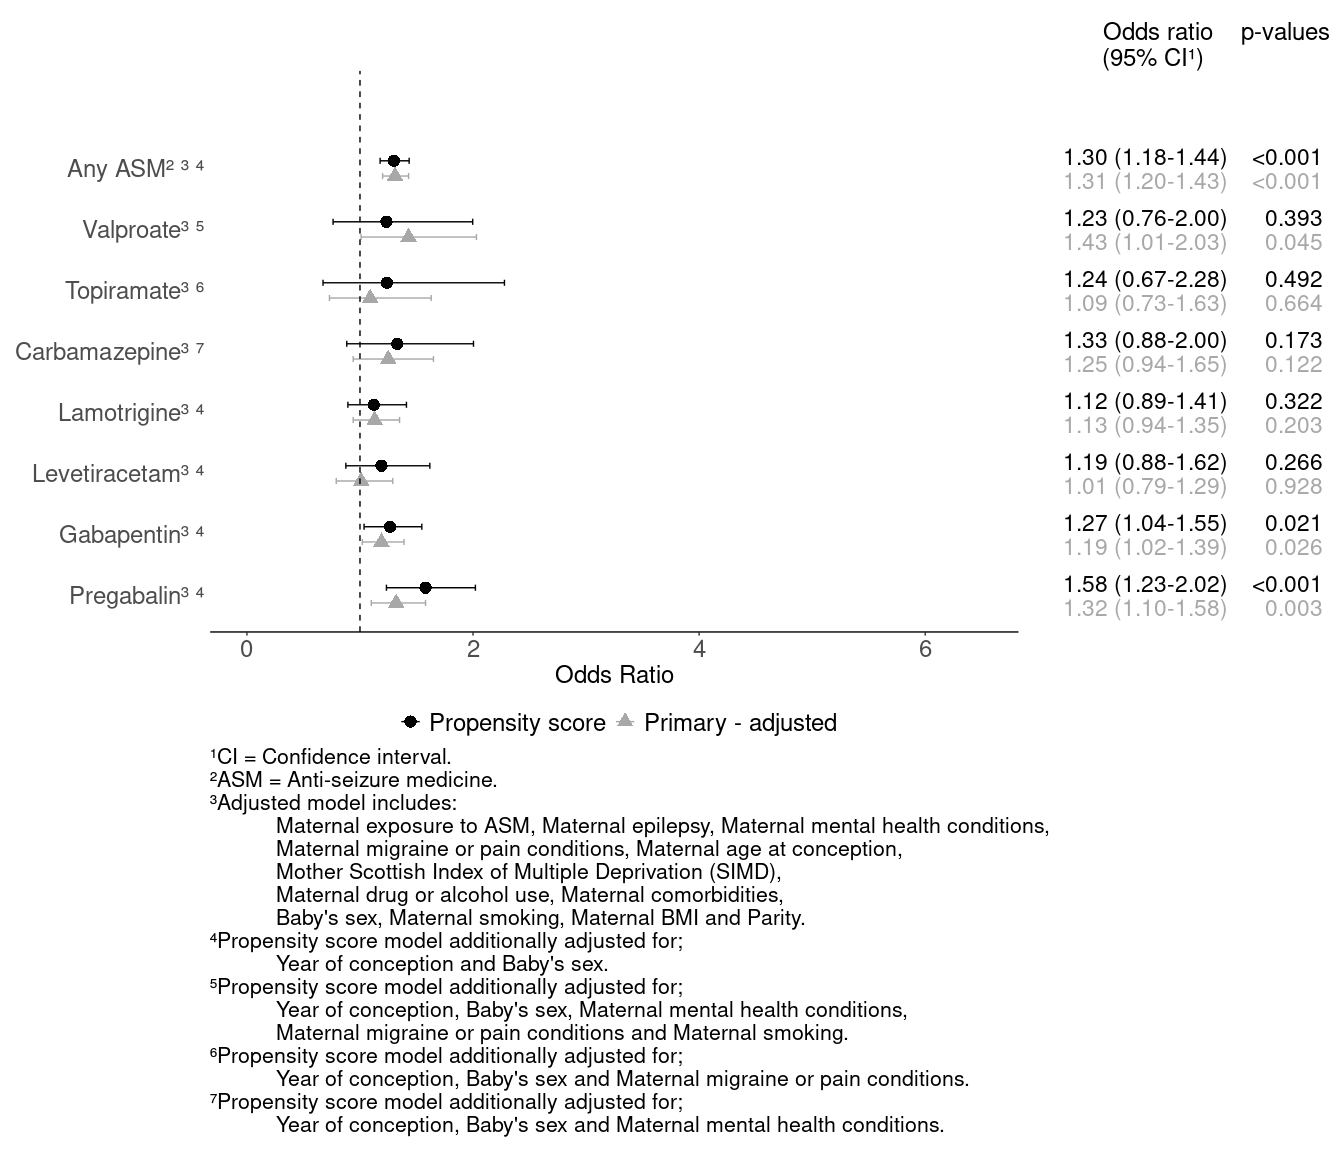


***Figure 9:*** *Odds ratios for the association between exposure to anti-seizure medicine (ASM) during pregnancy and early childhood developmental concerns (at 27-30 month assessment); live births from singleton pregnancies conceived in Scotland between 1 April 2010 and 1 July 2020 (live birth cohort):*

*Restricted to live-born babies to women reported to have epilepsy.*


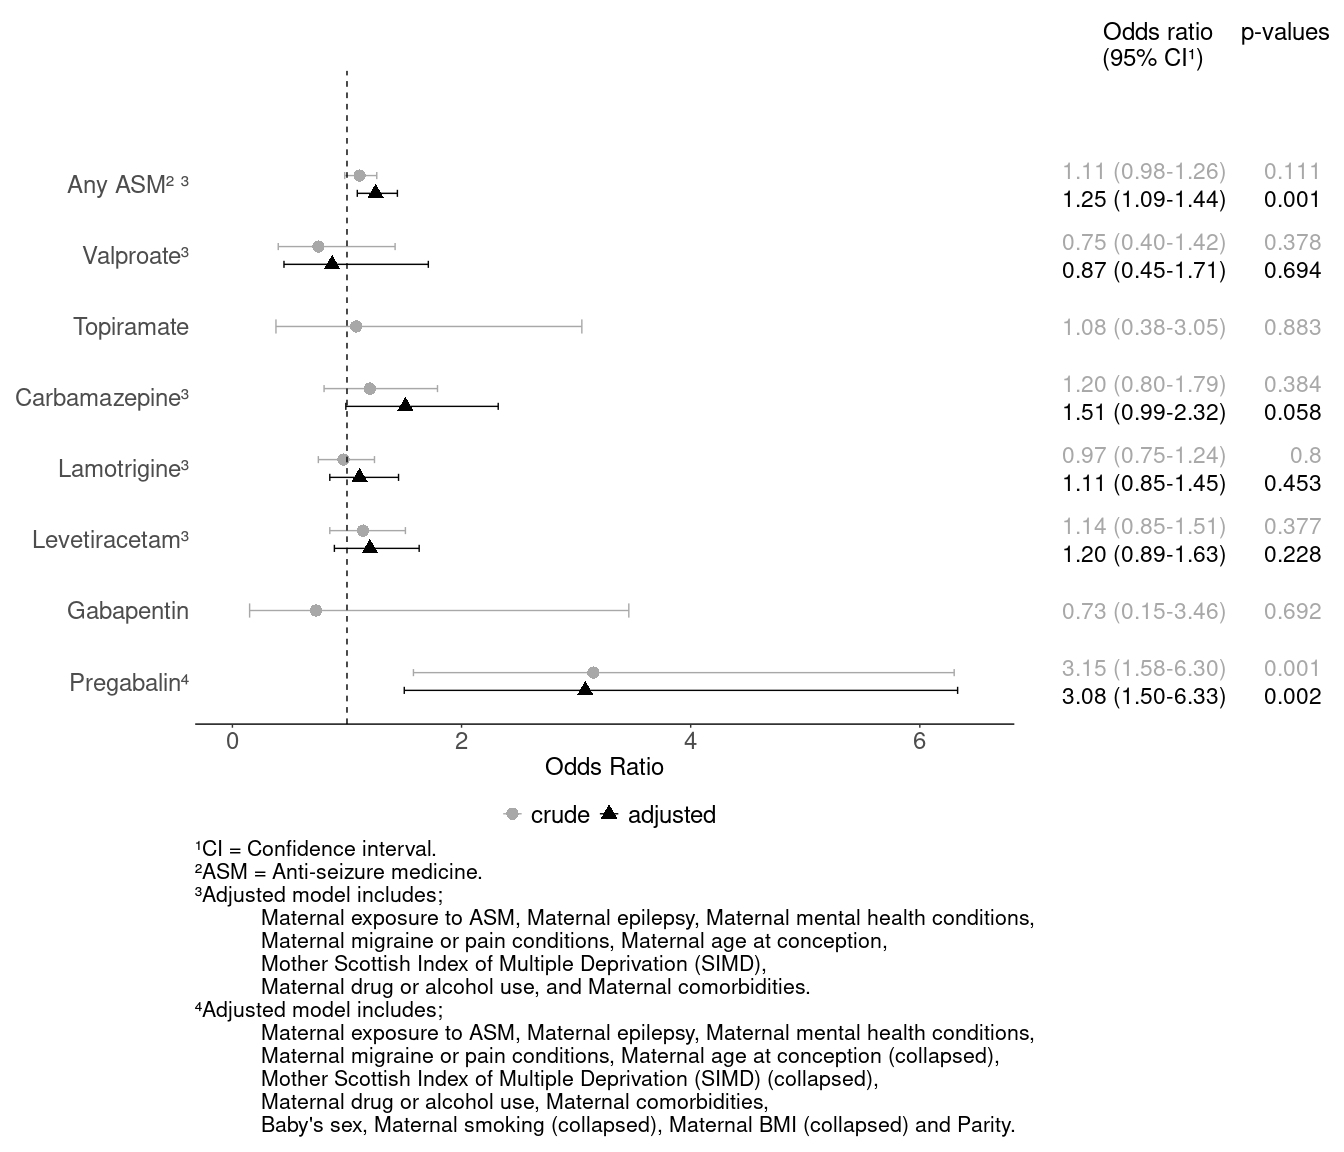


***Figure 10:*** *Odds ratios for the association between exposure to anti-seizure medicine (ASM) during pregnancy and early childhood developmental concerns (at 27-30 month assessment); live births from singleton pregnancies conceived in Scotland between 1 April 2010 and 1 July 2020 (live birth cohort):*

*Stratified by maternal high dose folic acid status.*


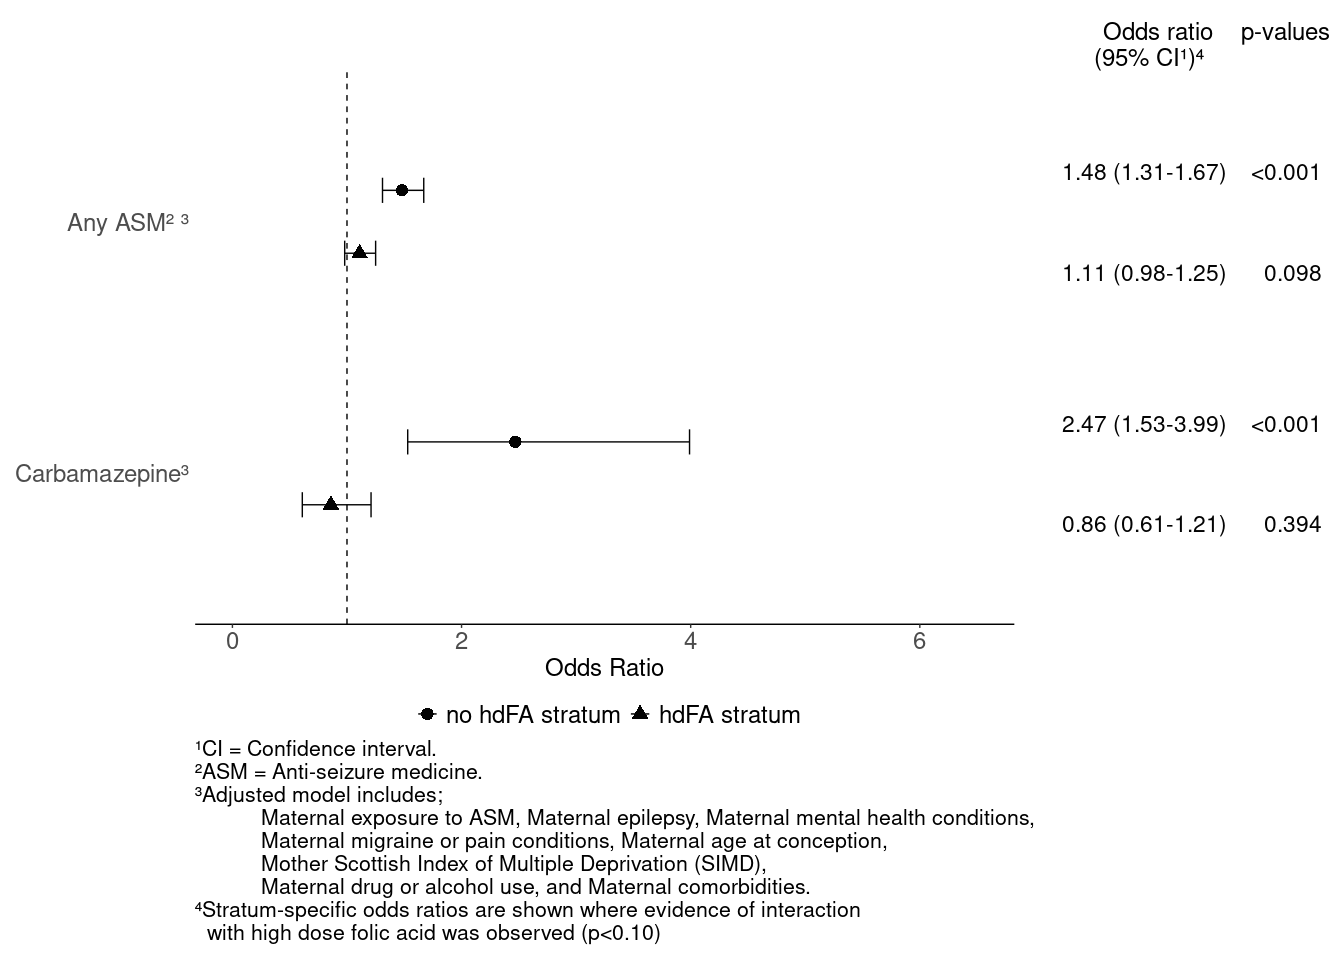

Supplement: Supplementary file 1 [file 46b744abd5bf15c44af73550.docx]
