# Supplementary material for: Anti-seizure medication in pregnancy and pregnancy, baby, and child outcomes: a population-based cohort study
Source: Research Square preprint supplement (doi:10.21203/rs.3.rs-6576771/v1), 2025-06-29
Supplement: Supplementary file 2 [file dea41b47f3086248ba90a48d.xlsx]

## Sheet: Supplementary table 1
Supplementary table 1: Characteristics of singleton pregnancies with known pregnancy outcome status conceived in Scotland between 1 April 2010 – 2 July 2023 (pregnancy cohort) by exposure to selected anti-seizure medicine (ASM) monotherapy.
	Valproate		Topiramate		Carbamazepine		Lamotrigine		Levetiracetam		Gabapentin		Pregabalin
	n	%	n	%	n	%	n	%	n	%	n	%	n	%
Total (n)	365		391		610		1976		1086		2624		2337
Condition indicating ASM use1
Any condition2	282	77.2603	341	87.2123	415	68.0328	1503	76.0628	750	69.0608	2411	91.8826	2243	95.9777
Maternal epilepsy2	121	33.1507	34	8.69565	221	36.2295	713	36.083	561	51.6575	41	1.5625	97	4.15062
Maternal mental health conditions2	191	52.3288	214	54.7315	245	40.1639	1034	52.3279	410	37.7532	1984	75.6098	1984	84.8952
Maternal migraine or pain conditions2	99	27.1233	291	74.4246	154	25.2459	557	28.1883	250	23.0203	1981	75.4954	1761	75.353
Maternal age at conception (years)
<20	16	4.38356	12	3.06905	16	2.62295	84	4.25101	79	7.2744	35	1.33384	18	0.770218
20-24	59	16.1644	89	22.7621	69	11.3115	342	17.3077	253	23.2965	290	11.0518	243	10.3979
25-29	86	23.5616	106	27.11	147	24.0984	574	29.0486	323	29.7422	680	25.9146	613	26.2302
30-34	112	30.6849	111	28.3887	204	33.4426	586	29.6559	282	25.9669	857	32.6601	773	33.0766
35-39	68	18.6301	61	15.601	130	21.3115	319	16.1437	126	11.6022	582	22.1799	538	23.021
≥40	24	6.57534	12	3.06905	44	7.21311	71	3.59312	23	2.11786	179	6.82165	152	6.50407
Unknown	0	0	0	0	0	0	0	0	0	0	1	0.0381098	0	0
Maternal deprivation
SIMD Q1 (most deprived)	153	41.9178	136	34.7826	189	30.9836	604	30.5668	399	36.7403	1144	43.5976	926	39.6234
SIMD Q2	82	22.4658	93	23.7852	131	21.4754	453	22.9251	225	20.7182	708	26.9817	624	26.7009
SIMD Q3	56	15.3425	71	18.1586	128	20.9836	366	18.5223	179	16.4825	388	14.7866	383	16.3885
SIMD Q4	46	12.6027	58	14.8338	94	15.4098	306	15.4858	162	14.9171	265	10.0991	272	11.6389
SIMD Q5 (least deprived)	28	7.67123	33	8.4399	68	11.1475	247	12.5	121	11.1418	118	4.49695	132	5.64827
Unknown	0	0	0	0	0	0	0	0	0	0	1	0.0381098	0	0
Baby sex3
Male	121	33.1507	139	35.5499	231	37.8689	774	39.17	455	41.8969	908	34.6037	782	33.4617
Female	121	33.1507	133	34.0153	235	38.5246	732	37.0445	417	38.3978	879	33.4985	723	30.9371
Unknown	123	33.6986	119	30.4348	144	23.6066	470	23.7854	214	19.7053	837	31.8979	832	35.6012
Maternal BMI at antenatal booking (kg/m2)3
Underweight (<18.5)	9	2.46575	5	1.27877	4	0.655738	44	2.22672	31	2.85451	46	1.75305	35	1.49765
Healthy weight (18.5-<25)	65	17.8082	71	18.1586	179	29.3443	531	26.8725	368	33.8858	506	19.2835	456	19.5122
Overweight (25-<30)	61	16.7123	57	14.578	120	19.6721	400	20.2429	221	20.3499	486	18.5213	379	16.2174
Obese (≥30)	89	24.3836	119	30.4348	147	24.0984	425	21.5081	215	19.7974	680	25.9146	569	24.3475
Unknown	141	38.6301	139	35.5499	160	26.2295	576	29.1498	251	23.1123	906	34.5274	898	38.4253
Maternal smoking at antenatal booking3
Current smoker	95	26.0274	54	13.8107	93	15.2459	411	20.7996	211	19.4291	786	29.9543	731	31.2794
Former smoker	32	8.76712	58	14.8338	84	13.7705	273	13.8158	102	9.39227	315	12.0046	260	11.1254
Never smoked	116	31.7808	156	39.8977	305	50	830	42.004	574	52.8545	747	28.468	550	23.5344
Unknown	122	33.4247	123	31.4578	128	20.9836	462	23.3806	199	18.3241	776	29.5732	796	34.0608
Maternal high dose folic acid2	170	46.5753	109	27.8772	372	60.9836	1106	55.9717	691	63.628	607	23.1326	619	26.4869
Maternal drug or alcohol use2	52	14.2466	35	8.95141	65	10.6557	296	14.9798	129	11.8785	493	18.7881	548	23.4489
Maternal comorbidity2	99	27.1233	154	39.3862	145	23.7705	559	28.2895	291	26.7956	1099	41.8826	992	42.4476
Number of previous deliveries3
0	89	24.3836	110	28.133	161	26.3934	625	31.6296	392	36.0958	487	18.5595	428	18.3141
≥1	166	45.4795	163	41.688	332	54.4262	882	44.6356	492	45.3039	1349	51.4101	1112	47.5824
Unknown	110	30.137	118	30.179	117	19.1803	469	23.7348	202	18.6004	788	30.0305	797	34.1036
ASM = Anti-seizure medicine.
1Categories for Condition indicating ASM use are not mutually exclusive, women may be counted against more than one condition.
2Binary variables (Yes / No classification based on presence / absence of information), so there are no 'Unknown' values.
3These variables are generally only recorded for pregnancies ending in a delivery (live or stillbirth), hence are more complete for the live birth cohort than the pregnancy or baby cohorts. They were therefore only included in adjusted models using the live birth cohort to examine early child developmental concerns.

## Sheet: Supplementary table 2
Supplementary table 2: Characteristics of live-born babies from singleton pregnancies conceived in Scotland between 1 April 2010 – 1 July 2020 (live birth cohort).
	Exposed (Any ASM)		Unexposed		Matched unexposed
	n	%	n	%	n	%
Total	5705		529596		-
N with unknown developmental outcome status	815	14.2857	84730	15.999	-
N available for analysis	4890		444866		48883
Condition indicating ASM use1
Any condition2	3950	80.7771	119304	26.818	13446	27.5065
Maternal epilepsy2	1293	26.4417	1387	0.311779	165	0.337541
Maternal mental health conditions2	2705	55.317	86460	19.4351	9679	19.8003
Maternal migraine or pain conditions2	2326	47.5665	55907	12.5672	6437	13.1682
Maternal age at conception (years)
<20	159	3.25153	24860	5.5882	2634	5.38838
20-24	767	15.6851	76854	17.2758	7301	14.9357
25-29	1365	27.9141	128544	28.895	13569	27.7581
30-34	1590	32.5153	135745	30.5137	15579	31.87
35-39	829	16.953	66030	14.8427	8154	16.6806
≥40	180	3.68098	12455	2.79972	1643	3.36109
Unknown	0	0	378	0.0849694	3	0
Maternal deprivation
SIMD Q1 (most deprived)	1860	38.0368	113312	25.471	12013	24.575
SIMD Q2	1208	24.7035	93399	20.9949	10206	20.8784
SIMD Q3	817	16.7076	82441	18.5316	9012	18.4359
SIMD Q4	606	12.3926	82546	18.5553	9282	18.9882
SIMD Q5 (least deprived)	399	8.15951	73139	16.4407	8368	17.1184
Unknown	0	0	29	0.00651882	2	0.0040914
Baby sex
Male	2485	50.818	228928	51.46	25157	51.4637
Female	2405	49.182	215938	48.54	23726	48.5363
Maternal BMI at antenatal booking (kg/m2)
Underweight (<18.5)	133	2.71984	11051	2.48412	1216	2.48757
Healthy weight (18.5-<25)	1593	32.5767	187036	42.0432	20529	41.9962
Overweight (25-<30)	1204	24.6217	116080	26.0933	12840	26.2668
Obese (≥30)	1523	31.1452	95252	21.4114	10676	21.8399
Unknown	437	8.93661	35447	7.96802	3622	7.40953
Maternal smoking at antenatal booking
Current smoker	1595	32.6176	68583	15.4166	7016	14.3526
Former smoker	698	14.274	64350	14.465	7118	14.5613
Never smoked	2355	48.1595	290543	65.3102	32579	66.6469
Unknown	242	4.94888	21390	4.80819	2170	4.43917
Maternal high dose folic acid2	2540	51.9427	37323	8.38972	4442	9.087
Maternal drug or alcohol use2	742	15.1738	16142	3.62851	1768	3.6168
Maternal comorbidity2	1697	34.7035	83187	18.6993	9315	19.0557
Number of previous deliveries
0	1678	34.3149	187514	42.1507	20243	41.4111
≥1	3083	63.047	247170	55.5606	27604	56.4695
Unknown	129	2.63804	10182	2.28878	1036	2.11935
ASM = Anti-seizure medicine.
1Categories for Condition indicating ASM use are not mutually exclusive, women may be counted against more than one condition.
2Binary variables (Yes / No classification based on presence / absence of information), so there are no 'Unknown' values.

## Sheet: Supplementary table 3
Supplementary table 3: Distribution of types of pregnancy loss among anti-seizure medicine (ASM) exposed and matched unexposed singleton pregnancies in pregnancy cohort.
Exposure	Outcome	N with stated outcome in exposed group	% with stated outcome in exposed group	N with stated outcome in matched unexposed group	% with stated outcome in matched unexposed group
Any ASM	No pregnancy loss (live birth)	7836	71.1652	83849	77.7178
	Pregnancy loss	3175	28.8348	24040	22.2822
	Spontaneous loss	955	8.67315	6481	6.0071
	Termination of pregnancy	2220	20.1617	17559	16.2751
Valproate	No pregnancy loss (live birth)	241	66.0274	2871	80.039
	Pregnancy loss	124	33.9726	716	19.961
	Spontaneous loss	42	11.5068	214	5.96599
	Termination of pregnancy	82	22.4658	502	13.995
Topiramate	No pregnancy loss (live birth)	271	69.3095	2934	76.6458
	Pregnancy loss	120	30.6905	894	23.3542
	Spontaneous loss	26	6.64962	233	6.08673
	Termination of pregnancy	94	24.0409	661	17.2675
Carbamazepine	No pregnancy loss (live birth)	463	75.9016	4734	79.111
	Pregnancy loss	147	24.0984	1250	20.889
	Spontaneous loss	64	10.4918	378	6.31684
	Termination of pregnancy	83	13.6066	872	14.5722
Lamotrigine	No pregnancy loss (live birth)	1495	75.6579	15397	79.411
	Pregnancy loss	481	24.3421	3992	20.589
	Spontaneous loss	130	6.57895	1076	5.54954
	Termination of pregnancy	351	17.7632	2916	15.0395
Levetiracetam	No pregnancy loss (live birth)	870	80.1105	8522	79.8314
	Pregnancy loss	216	19.8895	2153	20.1686
	Spontaneous loss	75	6.90608	531	4.97424
	Termination of pregnancy	141	12.9834	1622	15.1944
Gabapentin	No pregnancy loss (live birth)	1772	67.5305	19739	76.8324
	Pregnancy loss	852	32.4695	5952	23.1676
	Spontaneous loss	261	9.94665	1642	6.39134
	Termination of pregnancy	591	22.5229	4310	16.7763
Pregabalin	No pregnancy loss (live birth)	1488	63.6714	17311	75.7593
	Pregnancy loss	849	36.3286	5539	24.2407
	Spontaneous loss	230	9.84168	1468	6.42451
	Termination of pregnancy	619	26.4869	4071	17.8162
Spontaneous loss includes early spontaneous loss (miscarriage, ectopic pregnancy, and molar pregnancy at up to 23+6 weeks gestation) and spontaneous stillbirth (at 24+0 weeks gestation or over). These categories have been combined to protect confidentiality due to small numbers of pregnancies ending in stillbirth.
Termination of pregnancy includes terminations at any gestation.

## Sheet: Supplementary table 4
Supplementary table 4: Outcomes in exposed and matched unexposed groups.
Analyses using a propensity score approach.
Exposure	Outcome	Exposed			Matched unexposed
		Total	N with outcome	% with outcome	Total	N with outcome	% with outcome
Any ASM	Pregnancy loss1	11011	3175	28.8	11011	2933	26.6
	Congenital conditions2	8370	230	2.7	8370	198	2.4
	Early childhood developmental concerns3	4890	1270	26	4890	1047	21.4
Valproate	Pregnancy loss1	365	124	34	365	103	28.2
	Congenital conditions2	354	17	4.8	354	11	3.1
	Early childhood developmental concerns3	198	57	28.8	198	51	25.8
Topiramate	Pregnancy loss1	391	120	30.7	391	106	27.1
	Congenital conditions2	312	7	2.2	312	5	1.6
	Early childhood developmental concerns3	172	37	21.5	172	35	20.3
Carbamazepine	Pregnancy loss1	610	147	24.1	610	131	21.5
	Congenital conditions2	538	16	3	538	13	2.4
	Early childhood developmental concerns3	345	83	24.1	345	73	21.2
Lamotrigine	Pregnancy loss1	1976	481	24.3	1976	493	24.9
	Congenital conditions2	1470	39	2.7	1470	31	2.1
	Early childhood developmental concerns3	934	215	23	934	194	20.8
Levetiracetam	Pregnancy loss1	1086	216	19.9	1086	247	22.7
	Congenital conditions2	780	28	3.6	780	19	2.4
	Early childhood developmental concerns3	527	116	22	527	103	19.5
Gabapentin	Pregnancy loss1	2624	852	32.5	2624	694	26.4
	Congenital conditions2	2103	44	2.1	2103	52	2.5
	Early childhood developmental concerns3	1128	308	27.3	1128	256	22.7
Pregabalin	Pregnancy loss1	2337	849	36.3	2337	667	28.5
	Congenital conditions2	1618	38	2.3	1618	29	1.8
	Early childhood developmental concerns3	795	224	28.2	795	161	20.3
ASM = anti-seizure medicine.
1Analyses assessing pregnancy loss use pregnancy cohort
2Analyses assessing congenital conditions use baby cohort
3Analyses assessing early childhood developmental concerns use live birth cohort

## Sheet: Supplementary table 5
Supplementary table 5: Outcomes in exposed and matched unexposed groups.
Analysees restricted to pregnancies to women reported to have epilepsy.
Exposure	Outcome	Exposed			Matched unexposed
		Total	N with outcome	% with outcome	Total	N with outcome	% with outcome
Any ASM	Pregnancy loss1	2617	575	22	25656	6708	26.1
	Congenital conditions2	1983	70	3.5	19456	466	2.4
	Early childhood developmental concerns3	1293	360	27.8	12930	3336	25.8
Valproate	Pregnancy loss1	121	47	38.8	1197	288	24.1
	Congenital conditions2	120	3	2.5	1189	43	3.6
	Early childhood developmental concerns3	61	13	21.3	610	162	26.6
Topiramate	Pregnancy loss1	34	6	17.6	336	87	25.9
	Congenital conditions2	28	1	3.6	276	6	2.2
	Early childhood developmental concerns3	20	5	25	200	47	23.5
Carbamazepine	Pregnancy loss1	221	37	16.7	2168	518	23.9
	Congenital conditions2	197	5	2.5	1932	49	2.5
	Early childhood developmental concerns3	134	36	26.9	1340	315	23.5
Lamotrigine	Pregnancy loss1	713	146	20.5	7005	1748	25
	Congenital conditions2	543	16	2.9	5337	122	2.3
	Early childhood developmental concerns3	354	90	25.4	3540	922	26
Levetiracetam	Pregnancy loss1	561	114	20.3	5503	1347	24.5
	Congenital conditions2	389	14	3.6	3817	88	2.3
	Early childhood developmental concerns3	260	71	27.3	2600	645	24.8
Gabapentin	Pregnancy loss1	41	16	39	402	114	28.4
	Congenital conditions2	0	0	-	362	7	1.9
	Early childhood developmental concerns3	12	2	16.7	120	26	21.7
Pregabalin	Pregnancy loss1	97	36	37.1	946	305	32.2
	Congenital conditions2	68	4	5.9	667	8	1.2
	Early childhood developmental concerns3	37	20	54.1	370	102	27.6
ASM = anti-seizure medicine.
1Analyses assessing pregnancy loss use pregnancy cohort
2Analyses assessing congenital conditions use baby cohort
3Analyses assessing early childhood developmental concerns use live birth cohort

## Sheet: Supplementary table 6
Supplementary table 6: Odds ratios for the association between exposure to anti-seizure medicine (ASM) during pregnancy and pregnancy loss (pregnancy cohort), congential conditions (baby cohort), and early childhood developmental outcomes (live birth cohort): extended models including maternal receipt of high dose folic acid around the time of conception as a variable and an interaction term with…
Exposure	Outcome	Exposed			Matched unexposed			Adjusted odds ratio (main model + high dose folic acid + interaction exposure/high dose folic acid)
		N	N with outcome	% with outcome	N	N with outcome	% with outcome	aOR	95% CI	p-value	p-value for interaction term
Any ASM	Pregnancy loss1,4	11011	3175	28.8348	107889	24040	22.2822	1.86	1.74, 1.98	<0.001	<0.001
	Congenital conditions2,4	8370	230	2.7	82085	1693	2.06128	0.95	0.75, 1.19	0.639	0.505
	Early childhood developmental concerns3,6	4890	1270	25.9714	48883	7658	15.666	1.39	1.25, 1.55	<0.001	0.041
Valproate	Pregnancy loss1,4	365	124	33.9726	3587	716	19.961	2.51	1.81, 3.47	<0.001	0.754
	Congenital conditions2,4	354	17	4.80226	3480	76	2.18391	1.71	0.75, 3.92	0.203	0.922
	Early childhood developmental concerns3,4	198	57	28.7879	1979	308	15.5634	1.42	0.85, 2.37	0.179	0.932
Topiramate	Pregnancy loss1,4	391	120	30.6905	3828	894	23.3542	1.54	1.18, 2.02	0.002	0.219
	Congenital conditions2,5	312	7	2.24359	3060	64	2.0915	0.58	0.18, 1.90	0.372	0.205
	Early childhood developmental concerns3,6	172	37	21.5116	1720	253	14.7093	1.06	0.65, 1.71	0.822	0.913
Carbamazepine	Pregnancy loss1,4	610	147	24.0984	5984	1250	20.889	2.24	1.65, 3.05	<0.001	0.005
	Congenital conditions2,4	538	16	2.97398	5278	133	2.51989	0.8	0.31, 2.03	0.632	0.895
	Early childhood developmental concerns3,6	345	83	24.058	3449	556	16.1206	2.3	1.44, 3.68	<0.001	<0.001
Lamotrigine	Pregnancy loss1,4	1976	481	24.3421	19389	3992	20.589	2.14	1.82, 2.53	<0.001	<0.001
	Congenital conditions2,4	1470	39	2.65306	14414	294	2.03968	0.86	0.47, 1.59	0.635	0.75
	Early childhood developmental concerns3,6	934	215	23.0193	9335	1482	15.8757	1.31	0.98, 1.75	0.072	0.105
Levetiracetam	Pregnancy loss1,4	1086	216	19.8895	10675	2153	20.1686	1.9	1.46, 2.47	<0.001	<0.001
	Congenital conditions2,4	780	28	3.58974	7660	154	2.01044	2.08	0.93, 4.64	0.074	0.136
	Early childhood developmental concerns3,6	527	116	22.0114	5268	838	15.9074	1.05	0.70, 1.57	0.824	0.538
Gabapentin	Pregnancy loss1,4	2624	852	32.4695	25691	5952	23.1676	1.39	1.25, 1.54	<0.001	0.081
	Congenital conditions2,4	2103	44	2.09225	20608	400	1.94099	0.95	0.65, 1.38	0.786	0.631
	Early childhood developmental concerns3,6	1128	308	27.305	11276	1755	15.564	1.31	1.10, 1.56	0.002	0.156
Pregabalin	Pregnancy loss1,4	2337	849	36.3286	22850	5539	24.2407	1.63	1.46, 1.82	<0.001	0.26
	Congenital conditions2,4	1618	38	2.34858	15857	302	1.90452	1	0.65, 1.53	0.984	0.905
	Early childhood developmental concerns3,6	795	224	28.1761	7949	1175	14.7817	1.33	1.07, 1.65	0.011	0.595
ASM = anti-seizure medicine.
1Analyses assessing pregnancy loss use pregnancy cohort
2Analyses assessing congenital conditions use baby cohort
3Analyses assessing early childhood developmental concerns use live birth cohort
4Adjusted model includes: Maternal exposure to ASM, Maternal epilepsy, Maternal mental health conditions, Maternal migraine or pain conditions, Maternal age at conception, Mother Scottish Index of Multiple Deprivation (SIMD), Maternal drug or alcohol use, and Maternal comorbidities.
5Adjusted model includes: Maternal exposure to ASM, Maternal epilepsy, Maternal mental health conditions, Maternal migraine or pain conditions, Maternal age at conception (collapsed), Mother Scottish Index of Multiple Deprivation (SIMD), Maternal drug or alcohol use, and Maternal comorbidities.
6Adjusted model includes: Maternal exposure to ASM, Maternal epilepsy, Maternal mental health conditions, Maternal migraine or pain conditions, Maternal age at conception, Mother Scottish Index of Multiple Deprivation (SIMD), Maternal drug or alcohol use, and Maternal comorbidities, Baby sex, Maternal smoking, Maternal BMI and Parity.

## Sheet: Supplementary table 7
Supplementary table 7: Outcomes in exposed and matched unexposed groups.
Stratified by maternal high dose folic acid status.
Exposure	Outcome	High dose folic acid status	Exposed			Matched unexposed
			Total	N with outcome	% with outcome	Total	N with outcome	% with outcome
Any ASM	Pregnancy loss1	No	6382	2549	23.1	62621	14967	13.8
	Pregnancy loss1	Yes	4629	626	5.7	45835	4699	4.3
	Early childhood developmental concerns2	No	2350	655	13.4	23494	3691	7.5
	Early childhood developmental concerns2	Yes	2540	615	12.6	25398	4727	9.7
Carbamazepine	Pregnancy loss1	No	238	99	16.2	2342	520	8.6
	Pregnancy loss1	Yes	372	48	7.9	3684	372	6.2
	Early childhood developmental concerns2	No	94	33	9.6	940	131	3.8
	Early childhood developmental concerns2	Yes	251	50	14.5	2509	493	14.3
Lamotrigine	Pregnancy loss1	No	870	363	18.4	8528	1848	9.5
	Pregnancy loss1	Yes	1106	118	6	10954	1047	5.4
Levetiracetam	Pregnancy loss1	No	395	140	12.9	3894	764	7.1
	Pregnancy loss1	Yes	691	76	7	6834	687	6.4
Gabapentin	Pregnancy loss1	No	2017	737	28.1	19803	4860	18.8
	Pregnancy loss1	Yes	607	115	4.4	6009	629	2.4
ASM = anti-seizure medicine.
1Analyses assessing pregnancy loss use pregnancy cohort
2Analyses assessing early childhood developmental concerns use live birth cohort

## Sheet: Supplementary table 8
Supplementary table 8: Distribution of types of congenital conditions among babies exposed to anti-seizure medicines (ASMs) and matched unexposed babies from singleton pregnancies in baby cohort.
Exposure	Outcome	N with stated outcome in exposed group	% with stated outcome in exposed group	N with stated outcome in matched unexposed group	% with stated outcome in matched unexposed group
Any ASM	No congenital condition	8140	97.2521	80392	97.9375
	Congenital condition	230	2.74791	1693	2.0625
	Nervous system conditions	36	0.430108	192	0.233904
	Eye conditions	5	0.0597372	42	0.0511665
	Congenital heart conditions	88	1.05137	537	0.6542
	Respiratory conditions	5	0.0597372	47	0.0572577
	Oro-facial clefts	25	0.298686	106	0.129134
	Gastro-intestinal conditions	22	0.262843	176	0.214412
	Abdominal wall defects	3	0.0358423	42	0.0511665
	Kidney and urinary tract conditions	15	0.179211	170	0.207102
	Genital conditions	29	0.346476	239	0.291162
	Limb conditions	28	0.334528	290	0.353292
	Ear, face, and neck conditions	0	-	8	0.009746
	Other conditions	14	0.167264	84	0.102333
The number of babies with each type of congenital condition may sum to more than the total number with any condition, as an individual baby may have more than one condition.
Results are not shown for ASM monotherapies to protect confidentiality due to small numbers of babies exposed to specific ASMs with specific congenital conditions.

## Sheet: Supplementary table 9
Supplementary table 9: Outcomes in exposed and matched unexposed groups.
Analyses restricted to babies reaching at least 12+0 weeks gestation.
Exposure	Outcome	Exposed			Matched unexposed
		Total	N with outcome	% with outcome	Total	N with outcome	% with outcome
Any ASM	Congenital conditions1	6675	228	3.4	66187	1684	2.5
Valproate	Congenital conditions1	273	17	6.2	2704	76	2.8
Topiramate	Congenital conditions1	235	7	3	2330	60	2.6
Carbamazepine	Congenital conditions1	447	16	3.6	4430	126	2.8
Lamotrigine	Congenital conditions1	1210	38	3.1	11999	304	2.5
Levetiracetam	Congenital conditions1	668	28	4.2	6625	174	2.6
Gabapentin	Congenital conditions1	1629	44	2.7	16158	386	2.4
Pregabalin	Congenital conditions1	1220	38	3.1	12092	287	2.4
ASM = anti-seizure medicine
1Analyses assessing congenital conditions use baby cohort

## Sheet: Supplementary table 10
Supplementary table 10: Distribution of types of early childhood developmental concerns among live-born babies exposed to anti-seizure medicines (ASM) and matched unexposed live-born babies from singleton pregnancies in live birth cohort.
Exposure	Outcome	N with stated outcome in exposed group	% with stated outcome in exposed group	N with stated outcome in matched unexposed group	% with stated outcome in matched unexposed group
Any ASM	No early childhood developmental concern	3620	74.0286	41225	84.334
	Any early childhood developmental concern	1270	25.9714	7658	15.666
	Speech, language, and communication	960	19.6319	5789	11.8426
	Gross motor	261	5.33742	1129	2.3096
	Fine motor	331	6.76892	1444	2.95399
	Problem solving	245	5.01022	1293	2.64509
	Personal / social	459	9.3865	2371	4.85036
	Emotional / behavioural	607	12.4131	3088	6.31712
Valproate	No early childhood developmental concern	141	71.2121	1671	84.4366
	Any early childhood developmental concern	57	28.7879	308	15.5634
	Speech, language, and communication	44	22.2222	217	10.9651
	Gross motor	13	6.56566	43	2.17281
	Fine motor	14	7.07071	43	2.17281
	Problem solving	5	2.52525	15	0.757959
	Personal / social	16	8.08081	75	3.78979
	Emotional / behavioural	29	14.6465	124	6.26579
Topiramate	No early childhood developmental concern	135	78.4884	1467	85.2907
	Any early childhood developmental concern	37	21.5116	253	14.7093
	Speech, language, and communication	22	12.7907	185	10.7558
	Gross motor	8	4.65116	40	2.32558
	Fine motor	8	4.65116	36	2.09302
	Problem solving	9	5.23256	38	2.2093
	Personal / social	14	8.13953	64	3.72093
	Emotional / behavioural	21	12.2093	92	5.34884
Carbamazepine	No early childhood developmental concern	262	75.942	2893	83.8794
	Any early childhood developmental concern	83	24.058	556	16.1206
	Speech, language, and communication	69	20	413	11.9745
	Gross motor	14	4.05797	79	2.29052
	Fine motor	16	4.63768	94	2.72543
	Problem solving	7	2.02899	66	1.9136
	Personal / social	32	9.27536	150	4.34909
	Emotional / behavioural	41	11.8841	210	6.08872
Lamotrigine	No early childhood developmental concern	719	76.9807	7853	84.1243
	Any early childhood developmental concern	215	23.0193	1482	15.8757
	Speech, language, and communication	172	18.4154	1134	12.1478
	Gross motor	36	3.85439	222	2.37815
	Fine motor	56	5.99572	261	2.79593
	Problem solving	38	4.06852	226	2.421
	Personal / social	76	8.13704	418	4.47777
	Emotional / behavioural	91	9.74304	613	6.56668
Levetiracetam	No early childhood developmental concern	411	77.9886	4430	84.0926
	Any early childhood developmental concern	116	22.0114	838	15.9074
	Speech, language, and communication	88	16.6983	645	12.2437
	Gross motor	20	3.79507	125	2.37282
	Fine motor	30	5.6926	158	2.99924
	Problem solving	15	2.8463	156	2.96128
	Personal / social	32	6.07211	286	5.42901
	Emotional / behavioural	57	10.8159	352	6.68185
Gabapentin	No early childhood developmental concern	820	72.695	9521	84.436
	Any early childhood developmental concern	308	27.305	1755	15.564
	Speech, language, and communication	227	20.1241	1324	11.7418
	Gross motor	63	5.58511	246	2.18162
	Fine motor	87	7.71277	334	2.96204
	Problem solving	79	7.00355	310	2.7492
	Personal / social	126	11.1702	563	4.99291
	Emotional / behavioural	151	13.3865	688	6.10145
Pregabalin	No early childhood developmental concern	571	71.8239	6774	85.2183
	Any early childhood developmental concern	224	28.1761	1175	14.7817
	Speech, language, and communication	158	19.8742	907	11.4102
	Gross motor	50	6.28931	176	2.21411
	Fine motor	59	7.42138	256	3.22053
	Problem solving	53	6.66667	240	3.01925
	Personal / social	82	10.3145	398	5.00692
	Emotional / behavioural	118	14.8428	456	5.73657
The number of children with each type of developmental concern may sum to more than the total number with any concern, as an individual child may have more than one concern.

[truncated: 5 more sheets: Supplementary table 11, Supplementary table 12, Supplementary table 13, Supplementary table 14, Supplementary table 15]
